# Supplementary material
Source: PubMed Central journal article supplement (PMC5596242)
Supplement: cmi20162x1.pdf [file cmi20162x1.pdf]

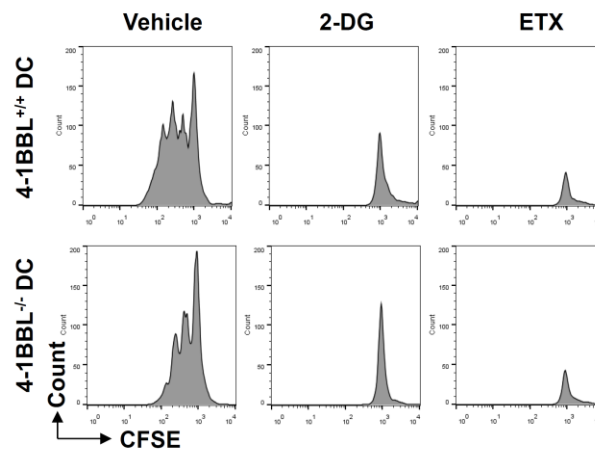

**Supplemental Figure 1. Proliferation of OT-1 CD8 T cells in response to OVA-pulsed 4-1BBL<sup>+/+</sup> and 4-1BBL<sup>-/-</sup> dendritic cells in the presence of 2-DG or ETX.**

CD11c<sup>+</sup> dendritic cells were isolated from spleens of 4-1BBL<sup>+/+</sup> and 4-1BBL<sup>-/-</sup> C57BL/6 mice, and cultured with 100 µg/ml of OVA for 4 h. CD8<sup>+</sup> T cells isolated from OT-1 mice were labeled with 10 µM CFSE, mixed with the OVA-pulsed 4-1BBL<sup>+/+</sup> and 4-1BBL<sup>-/-</sup> DCs in a 10:1 ratio, and cultured for 24 h. The cells were further treated with 5 mM 2-DG, 100 µM ETX, or DMSO as a control, and cultured for another 48 h. Cells were acquired with a FACSCalibur (BD Bioscience) and CFSE dilutions were analyzed with FlowJo software.

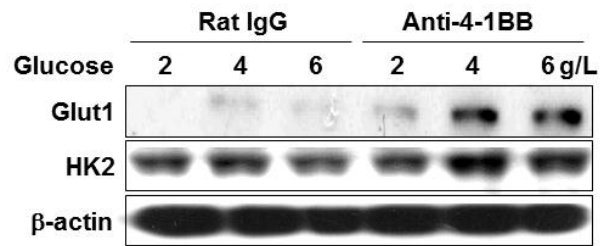

**Supplemental Figure 2. GLUT1 and HK2 expression in CD8<sup>+</sup> T cells in low and high glucose.**

CD8<sup>+</sup> T cells were suspended in RPMI<sub>10</sub> medium (2 g/L glucose) and activated with 0.1  $\mu$ g/ml anti-CD3 mAb for 16 h. The cells were treated with an additional 2 or 4 g/L glucose, and further stimulated with rat IgG or anti-4-1BB mAb for another 24 h. Western blots were performed with antibodies specific for GLUT1, HK2, and  $\beta$ -actin.
